# Supplementary material for: Significant performance improvement in dye-sensitized solar cells employing cobalt(iii/ii) tris-bipyridyl redox mediators by co-grafting alkyl phosphonic acids with a ruthenium sensitizer
Source: Royal Society of Chemistry journal article supplement (doi:10.1039/c3cp50998b), 2013-01-01
Supplement: c3cp50998b.pdf [file c3cp50998b.pdf]

## Electronic Supplementary Information

### Significant performance improvement in dye-sensitized solar cells employing the cobalt(III/II) tris-bipyridyl redox mediator by co-grafting alkyl phosphonic acids with a ruthenium sensitizer

Yeru Liu, James Robert Jennings, Xingzhu Wang and Qing Wang\*

*Department of Materials Science and Engineering, Faculty of Engineering, NUSNNI-NanoCore, National University of Singapore, Singapore 117574. Fax: 65 6776 3604; Tel: 65 6516 7118; E-mail: msewq@nus.edu.sg*

Transient absorbance ( $\Delta OD$ ) decays following pulsed laser excitation for  $TiO_2$  layers sensitized by Z907 dye (with or without coadsorbents) were recorded at  $\lambda = 680$  nm, where the main contribution to  $\Delta OD$  is from the oxidized dye (Fig. S1).<sup>1</sup> The absorbance decays were fitted with a stretched exponential function

$$\Delta OD = \Delta OD_0 \exp \left[ - \left( \frac{t}{\tau_{KWW}} \right)^\alpha \right] \quad (S1)$$

where  $\Delta OD_0$  is the absorbance change at  $t = 0$ ,  $\tau_{KWW}$  is a characteristic lifetime and  $\alpha$  is the stretching exponent. Weighted-average lifetimes ( $\tau_{obs}$ ) appropriate for calculating the steady-state dye regeneration yield<sup>2</sup> were derived using

$$\tau_{obs} = \frac{\tau_{KWW}}{\alpha} \Gamma \left( \frac{1}{\alpha} \right) \quad (S2)$$

where  $\Gamma()$  is the gamma function. Dye regeneration yields ( $\eta_{reg}$ ) were then estimated using

$$\eta_{reg} = 1 - \frac{\tau_{obs}}{\tau_{obs,0}} \quad (S3)$$

where  $\tau_{\text{obs}}$  and  $\tau_{\text{obs},0}$  are the weighted-average lifetimes in the presence or absence of  $[\text{Co}(\text{bpy})_3]^{2+}$  (i.e. the electron donor which regenerates the oxidized dye), respectively. The results of this analysis are summarized in Table S1.

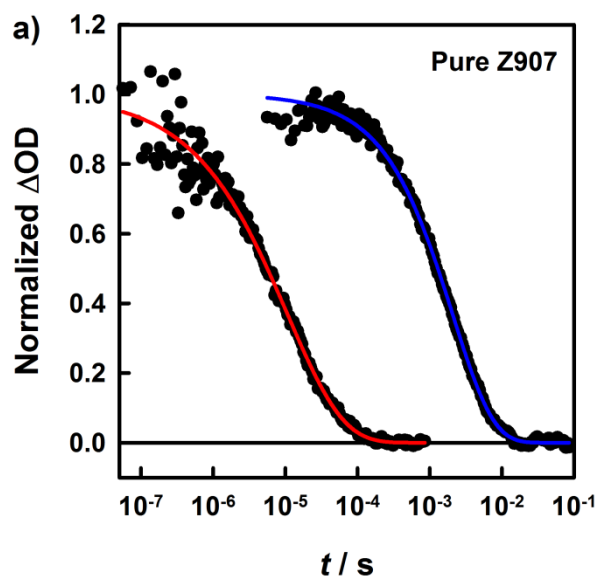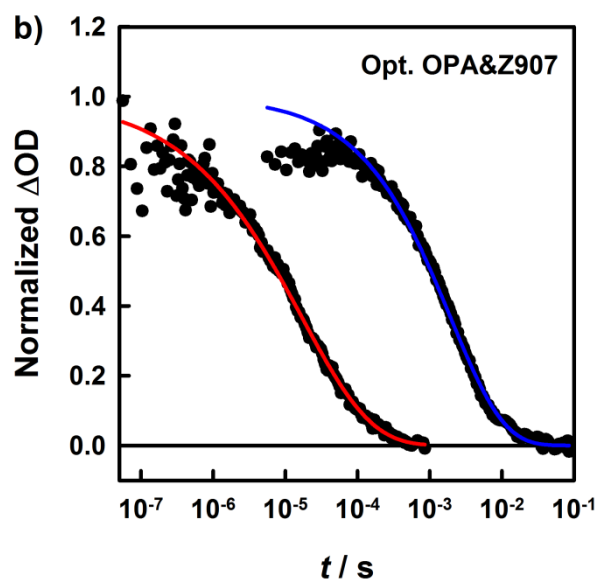

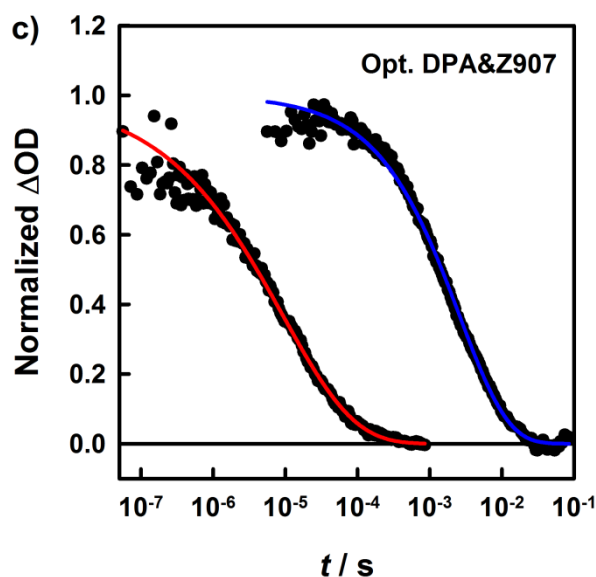

Fig. S1 Transient absorbance ( $\Delta OD$ ) decays at 680 nm following pulsed laser excitation ( $\lambda = 532$  nm, pulse duration  $\sim 5$  ns, pulse fluence  $\sim 10 \mu\text{J cm}^{-2}$ ) for a) Pure Z907, b) OPA:Z907 1:20 and c) DPA:Z907 1:40 in the presence (left trace) or absence (right trace) of  $[\text{Co}(\text{bpy})_3]^{2+}$ . Red and blue solid lines are fits of eq. S1 to the data.

Table S1 Transient absorbance decay constants and regeneration efficiencies for  $\text{TiO}_2$  films sensitized by Z907 with or without coadsorbents, calculated using eq. S2 and S3.

|               | $\tau_{\text{obs}} / \mu\text{s}$ | $\tau_{\text{obs},0} / \mu\text{s}$ | $\eta_{\text{reg}} / \%$ |
|---------------|-----------------------------------|-------------------------------------|--------------------------|
| Pure Z907     | $17.6 \pm 0.8$                    | $2420 \pm 21.2$                     | $99.3 \pm 0.03$          |
| Opt. OPA&Z907 | $41.4 \pm 1.7$                    | $2982 \pm 37.1$                     | $98.6 \pm 0.06$          |
| Opt. DPA&Z907 | $24.3 \pm 1.1$                    | $3547 \pm 33.0$                     | $99.3 \pm 0.03$          |

#### References:

- (1) Zhang, Z. P.; Ito, S.; Moser, J. E.; Zakeeruddin, S. M.; Grätzel, M. *ChemPhysChem* **2009**, *10*, 1834-1838
- (2) Anderson, A. Y.; Barnes, P. R. F.; Durrant, J. R.; O'Regan, B. C. *J. Phys. Chem. C* **2011**, *115*, 2439.
